# Supplementary material
Source: MDPI journal article supplement (https://www.mdpi.com/2673-964X/4/1/1)
Supplement: s1 [file s1]

Supplementary Materials Table S1. Data used to construct geological cross-sections for each coastal sector as illustrated in Figure 4. Yellow infill = data generated from shell. Orange infill = data generated from plant material. nd = no data provided.

| Sector                  | Reference                                         | Location                | Sample ID  | Paleo environment  | Material sampled   | Sample depth (m) | Age in RC yr BP | RC age after OxCal Correction (cal yr BP) | Age reported in cal yr BP | Std Dev |
|-------------------------|---------------------------------------------------|-------------------------|------------|--------------------|--------------------|------------------|-----------------|-------------------------------------------|---------------------------|---------|
| Southern North Carolina | Berelson and Heron (1985) [1]                     | Back barrier lagoon     | C19        | Back barrier marsh | Oyster             | -4.00            | 3780            | 4160                                      |                           | 140     |
|                         |                                                   | Back barrier lagoon     | C37        | Back barrier marsh | Shell              | -2.60            | 1520            | 1417                                      |                           | 70      |
|                         |                                                   | Back barrier lagoon     | C26        | Back barrier marsh | Gastropod          | -2.10            | 3080            | 3233                                      |                           | 90      |
|                         |                                                   | Back barrier lagoon     | C39        | Back barrier marsh | Articulated oyster | -4.80            | 4800            | 5526                                      |                           | 100     |
|                         | Engelhart and Horton (2012) [2]                   | Jarrett Bay             | SC-VI-53-1 | Not specified      | Salt peat          | -0.73            |                 |                                           | 585                       | nd      |
|                         | Index Pts only                                    | Jarrett Bay             | SC-VI-53-2 | Not specified      | Salt peat          | -1.91            |                 |                                           | 2197                      | nd      |
|                         | Includes Horton et al. (2009) [3] except as below | Croatan National Forest | QC-801     | Not specified      | Salt peat          | -0.77            |                 |                                           | 1056                      | nd      |
|                         |                                                   | Croatan National Forest | QC-802     | Not specified      | Salt peat          | -1.27            |                 |                                           | 1646                      | nd      |
|                         |                                                   | Wilmington              | QC-799     | Not specified      | Salt peat          | -0.93            |                 |                                           | 1267                      | nd      |
|                         |                                                   | Wilmington              | QC-793A    | Not specified      | Salt peat          | -3.03            |                 |                                           | 3644                      | nd      |
|                         |                                                   | Wilmington              | QC-793B    | Not specified      | Salt peat          | -3.43            |                 |                                           | 3647                      | nd      |
|                         |                                                   | Wilmington              | QC-794     | Not specified      | Salt peat          | -4.23            |                 |                                           | 3916                      | nd      |
|                         |                                                   | Wilmington              | QC-796     | Not specified      | Salt peat          | -5.53            |                 |                                           | 4333                      | nd      |
|                         |                                                   | Wilmington              | QC-797     | Not specified      | Salt peat          | -8.03            |                 |                                           | 6539                      | nd      |
|                         |                                                   | Southport               | I-1576     | Not specified      | Salt peat          | -1.90            |                 |                                           | 2465                      | nd      |

|                         |                             |                |              |                    |                     |       |  |  |      |     |
|-------------------------|-----------------------------|----------------|--------------|--------------------|---------------------|-------|--|--|------|-----|
|                         | Horton et al. (2009) [3]    | Southport      | I-1577       | Not specified      | Peat                | -2.50 |  |  | 3268 | nd  |
|                         | Index points only           | Southport      | I-1579       | Not specified      | Peat                | -3.70 |  |  | 4096 | nd  |
|                         | Timmons et al. (2010) [4]   | Bogue Sound    | BS-08-2 Core | Facies D Lagoon    | Articulated bivalve | -1.55 |  |  | 930  | 30  |
|                         |                             | Bogue Sound    | BS-08-4      | Facies D Lagoon    | Articulated bivalve | -1.89 |  |  | 390  | 50  |
|                         |                             | Bogue Sound    | BS-08-4      | Facies A Lagoon    | Oyster              | -2.79 |  |  | 2525 | 30  |
|                         |                             | Bogue Sound    | BS-08-6      | Facies D Lagoon    | Articulated bivalve | -1.63 |  |  | 1080 | 55  |
|                         |                             | Bogue Sound    | BS-08-8      | Facies D Lagoon    | Articulated bivalve | -1.33 |  |  | 1100 | 45  |
|                         |                             | Bogue Sound    | BS-08-22     | Facies D Lagoon    | Articulated bivalve | -4.03 |  |  | 4010 | 65  |
|                         |                             | Bogue Sound    | BS-08-22     | Unknown            | Wood                | -4.70 |  |  | 5300 | 20  |
|                         |                             | Bogue Sound    | BS-08-22     | Facies D Lagoon    | Articulated oyster  | -5.00 |  |  | 4730 | 60  |
|                         |                             | Bogue Sound    | BS-08-22     | Facies D Lagoon    | Bivalve             | -6.21 |  |  | 5525 | 40  |
|                         | Lazar et al. (2016) [5]     | Bogue Sound    | BS-08-02     | Estuary            | Articulated oyster  | -3.24 |  |  | 3390 | 70  |
|                         |                             | Bogue Banks    | SB-08-03     | Estuary            | Bivalve             | -4.59 |  |  | 3920 | 100 |
|                         | Rodriguez et al. (2018) [6] | Oslow Beach    | F1-4         | Base of lagoon     | Bivalve             | -1.50 |  |  | 935  | nd  |
|                         |                             | Oslow Beach    | F1-2         | Marsh above lagoon | Plant fragments     | -0.80 |  |  | 297  | nd  |
| Northern South Carolina | Gayes et al. (1992) [7]     | Merrells Inlet | 1            | Marsh              | Peat                | -4.21 |  |  | 2009 | nd  |
|                         |                             | Merrells Inlet | 2            | Marsh              | Peat                | -5.65 |  |  | 2721 | nd  |
|                         |                             | Merrells Inlet | 3            | Marsh              | Peat                | -4.73 |  |  | 3001 | nd  |
|                         |                             | Merrells Inlet | 6            | Marsh              | Peat                | -5.26 |  |  | 2335 | nd  |
|                         |                             | Merrells Inlet | 7            | Marsh              | Peat                | -3.72 |  |  | 2782 | nd  |
|                         |                             | Merrells Inlet | 8            | Marsh              | Peat                | -3.13 |  |  | 3593 | nd  |

|                                                         |                |           |               |            |        |      |      |    |
|---------------------------------------------------------|----------------|-----------|---------------|------------|--------|------|------|----|
|                                                         | Merrells Inlet | 103       | Marsh         | Peat       | -0.45  |      | 487  | nd |
|                                                         | Merrells Inlet | 103       | Marsh         | Peat       | -1.18  |      | 4281 | nd |
|                                                         | Merrells Inlet | 106       | Marsh         | Peat       | -2.64  |      | 2649 | nd |
| Gardner and Porter<br>(2001) [8]                        | North Inlet    | 10        | Back barrier  | Oyster     | -4.37  | 2750 | 2857 | 50 |
|                                                         | North Inlet    | 13        | Back barrier  | Oyster     | -5.57  | 2275 | 2253 | 50 |
|                                                         | North Inlet    | 20        | Back barrier  | Oyster     | -5.21  | 3230 | 3464 | 50 |
|                                                         | North Inlet    | 21        | Back barrier  | Shell      | -2.85  | 1670 | 1556 | 50 |
|                                                         | North Inlet    | 26        | Back barrier  | Oyster     | -1.32  | 1460 | 1398 | 50 |
|                                                         | North Inlet    | 26        | Back barrier  | Oyster     | -3.53  | 1915 | 1848 | 50 |
|                                                         | North Inlet    | 28        | Back barrier  | Oyster     | -2.72  | 2160 | 2157 | 50 |
|                                                         | North Inlet    | 30        | Back barrier  | Oyster     | -5.47  | 1330 | 1236 | 50 |
|                                                         | North Inlet    | 33        | Back barrier  | Shell      | -6.01  | 4335 | 4938 | 50 |
|                                                         | North Inlet    | 36        | Back barrier  | Oyster     | -1.25  | 605  | 597  | 50 |
|                                                         | North Inlet    | 36        | Back barrier  | Shell hash | -4.71  | 3550 | 3836 | 50 |
| Engelhart and Horton<br>(2012) [2]<br>Index points only | Murrells Inlet | GX-16569  | Not specified | Salt peat  | -3.02  |      | 4633 | nd |
|                                                         | Pee Dee River  | QC-602    | Not specified | Salt peat  | -3.41  |      | 4036 | nd |
|                                                         | Pee Dee River  | QC-603    | Not specified | Salt peat  | -2.61  |      | 2660 | nd |
|                                                         | Pee Dee River  | QC-813    | Not specified | Salt peat  | -6.60  |      | 6433 | nd |
|                                                         | Pee Dee River  | QC-814    | Not specified | Salt peat  | -6.59  |      | 6992 | nd |
|                                                         | Santee River   | QC-595    | Not specified | Salt peat  | -4.11  |      | 4955 | nd |
|                                                         | Santee River   | QC-596(1) | Not specified | Salt peat  | -3.01  |      | 3256 | nd |
|                                                         | Santee River   | QC-596(2) | Not specified | Salt peat  | -3.01  |      | 3323 | nd |
|                                                         | Murrells Inlet | GX-15987  | Not specified | Salt peat  | -3.05  |      | 3598 | nd |
|                                                         | Pee Dee River  | QC-604    | Not specified | Salt peat  | -4.81  |      | 5343 | nd |
| Long et al. (2020) [9]                                  | Cape Romain    | VC23:0.63 | Shelf sand    | Shell      | -12.93 |      | 850  | 65 |
|                                                         | Cape Romain    | VC23:1.37 | Shelf sand    | Shell      | -13.66 |      | 3249 | 82 |
|                                                         | Cape Romain    | VC24:0.40 | Shelf sand    | Shell      | -12.41 |      | 190  | 76 |

|                         |                                 |                    |           |               |           |        |  |  |      |     |
|-------------------------|---------------------------------|--------------------|-----------|---------------|-----------|--------|--|--|------|-----|
|                         |                                 | Cape Romain        | VC24:0.62 | Shelf sand    | Shell     | -12.63 |  |  | 2796 | 57  |
|                         |                                 | Cape Romain        | VC24:1.07 | Shelf sand    | Shell     | -13.09 |  |  | 3768 | 90  |
|                         |                                 | Cape Romain        | VC24:1.23 | Shelf sand    | Shell     | -13.24 |  |  | 4700 | 104 |
|                         |                                 | Cape Romain        | VC24:1.44 | Shelf sand    | Shell     | -13.45 |  |  | 8460 | 82  |
| Southern South Carolina | Engelhart and Horton (2012) [2] | Combahee River     | QC-589    | Not specified | Salt peat | -4.10  |  |  | 6667 | nd  |
|                         | Index points only               | Combahee River     | QC-593    | Not specified | Salt peat | -3.95  |  |  | 6025 | nd  |
|                         |                                 | Combahee River     | QC-594    | Not specified | Salt peat | -3.58  |  |  | 6384 | nd  |
|                         |                                 | Combahee River     | QC-609    | Not specified | Salt peat | -2.20  |  |  | 3052 | nd  |
|                         |                                 | Combahee River     | QC-610_a  | Not specified | Salt peat | -2.68  |  |  | 3580 | nd  |
|                         |                                 | Combahee River     | QC-828    | Not specified | Salt peat | -3.29  |  |  | 5077 | nd  |
|                         |                                 | Coosawatchie River | QC-826    | Not specified | Salt peat | -1.28  |  |  | 2117 | nd  |
|                         |                                 | Coosawatchie River | QC-827    | Not specified | Salt peat | -0.72  |  |  | 720  | nd  |
|                         |                                 | Savannah River     | QC-599    | Not specified | Salt peat | -2.61  |  |  | 3278 | nd  |
|                         |                                 | Savannah River     | QC-600    | Not specified | Salt peat | -2.41  |  |  | 2392 | nd  |
|                         |                                 | Savannah River     | QC-821    | Not specified | Salt peat | -3.26  |  |  | 2466 | nd  |
|                         |                                 | Savannah River     | QC-825    | Not specified | Salt peat | -1.96  |  |  | 3316 | nd  |
|                         |                                 | Cooper-Wando River | QC-584    | Not specified | Salt peat | -2.50  |  |  | 3280 | nd  |
|                         |                                 | Cooper-Wando River | QC-586    | Not specified | Salt peat | -4.40  |  |  | 5754 | nd  |
|                         |                                 | Cooper-Wando River | QC-587    | Not specified | Salt peat | -3.45  |  |  | 4906 | nd  |
|                         |                                 | Cooper-Wando River | QC-588    | Not specified | Salt peat | -2.85  |  |  | 4643 | nd  |
|                         |                                 | Cooper-Wando River | QC-611    | Not specified | Salt peat | -1.60  |  |  | 2117 | nd  |

|                 |                           |                     |            |               |                  |        |      |  |      |     |
|-----------------|---------------------------|---------------------|------------|---------------|------------------|--------|------|--|------|-----|
|                 |                           | Cooper-Wando River  | QC-613     | Not specified | Salt peat        | -1.85  |      |  | 2376 | nd  |
|                 |                           | Cooper-Wando River  | QC-702     | Not specified | Salt peat        | -2.80  |      |  | 5310 | nd  |
|                 |                           | Cooper-Wando River  | QC-703     | Not specified | Salt peat        | -2.00  |      |  | 3278 | nd  |
|                 |                           | Cooper-Wando River  | QC-704     | Not specified | Salt peat        | -3.95  |      |  | 5423 | nd  |
|                 | Duc (1981) [10]           | Kiawah Island marsh | KIV 11     | Shell layer   | Basal lag        | -2.90  | 4435 |  | 5079 | 50  |
|                 | Long et al. (2020) [9]    | Folly-Kiawah        | VC14:1.92  | Shelf sand    | Shell            | -15.58 |      |  | 1604 | 84  |
|                 |                           | Folly-Kiawah        | VC15:0.67  | Shelf sand    | Shell            | -9.54  |      |  | 4383 | 93  |
|                 |                           | Folly-Kiawah        | VC15:3.03  | Shelf sand    | Shell            | -11.92 |      |  | 4888 | 71  |
|                 |                           | Folly-Kiawah        | VC18:0.66  | Shelf sand    | Shell            | -13.70 |      |  | 3627 | 72  |
|                 |                           | Folly-Kiawah        | VC19:2.10  | Shelf sand    | Shell            | -15.91 |      |  | 7883 | 66  |
|                 |                           | Folly-Kiawah        | VC21:0.97  | Shelf sand    | Shell            | -13.71 |      |  | 7634 | 64  |
|                 |                           | Folly-Kiawah        | VC21:1.65  | Shelf sand    | Shell            | -14.39 |      |  | 3961 | 94  |
|                 |                           | Folly-Kiawah        | VC21:3.14  | Shelf sand    | Shell            | -15.88 |      |  | 8328 | 66  |
|                 | Long et al. (2021) [11]   | Folly-Kiawah        | SC04:0.56  | Shelf sand    | Shell            | -12.85 |      |  | 640  | 47  |
| Georgia-Florida | Long et al. (2021) [11]   | Cumberland Island   | GA-03:1.93 | Shelf sand    | Shell            | -12.33 |      |  | 2570 | 107 |
|                 |                           | St. Simons Island   | GA-05:2.25 | Shelf sand    | Shell            | -13.15 |      |  | 7630 | 56  |
|                 |                           | St. Simons Island   | GA-07:3.12 | Shelf sand    | Shell            | -14.42 |      |  | 360  | 66  |
|                 |                           | St. Simons Island   | GA-07:3.14 | Shelf sand    | Shell            | -14.44 |      |  | 320  | 62  |
|                 |                           | St. Simons Island   | GA-07:3.17 | Shelf sand    | Shell            | -14.47 |      |  | 5520 | 60  |
|                 | Vaughn et al. (2021) [12] | St. Augustine Beach | Bottom     | Mangrove      | Wetland sediment | -1.80  |      |  | 2860 | nd  |
|                 |                           | St. Augustine Beach | Bottom     | Salt marsh    | Wetland sediment | -2.66  |      |  | 4720 | nd  |
|                 |                           | St. Augustine Beach | Bottom     | Transitional  | Wetland sediment | -2.84  |      |  | 4740 | nd  |

|                     |     |              |                  |       |      |    |
|---------------------|-----|--------------|------------------|-------|------|----|
| St. Augustine Beach | 50  | Mangrove     | Wetland sediment | -0.50 | 310  | nd |
| St. Augustine Beach | 50  | Salt marsh   | Wetland sediment | -0.50 | 860  | nd |
| St. Augustine Beach | 50  | Transitional | Wetland sediment | -0.50 | 530  | nd |
| St. Augustine Beach | 110 | Transitional | Wetland sediment | -1.10 | 2530 | nd |
| St. Augustine Beach | 110 | Salt marsh   | Wetland sediment | -0.70 | 1220 | nd |
| St. Augustine Beach | 110 | Salt marsh   | Wetland sediment | -0.10 | 240  | nd |
| St. Augustine Beach | 110 | Transitional | Wetland sediment | -0.40 | 440  | nd |
| St. Augustine Beach | 110 | Mangrove     | Wetland sediment | -1.60 | 2500 | nd |
| St. Augustine Beach | 110 | Mangrove     | Wetland sediment | -0.40 | 250  | nd |

## References

1. Berelson, W.M.; Heron, S.D. Correlations between Holocene Flood Tidal Delta and Barrier Island Inlet Fill Sequences: Back Sound-Shackleford Banks, North Carolina. *Sedimentology* **1985**, *32*, 215–222, doi:10.1111/j.1365-3091.1985.tb00504.x.
2. Engelhart, S.E.; Horton, B.P. Holocene Sea Level Database for the Atlantic Coast of the United States. *Quaternary Science Reviews* **2012**, *54*, 12–25, doi:10.1016/j.quascirev.2011.09.013.
3. Horton, B.P.; Peltier, W.R.; Culver, S.J.; Drummond, R.; Engelhart, S.E.; Kemp, A.C.; Mallinson, D.; Thieler, E.R.; Riggs, S.R.; Ames, D.V.; et al. Holocene Sea-Level Changes along the North Carolina Coastline and Their Implications for Glacial Isostatic Adjustment Models. *Quaternary Science Reviews* **2009**, *28*, 1725–1736, doi:10.1016/j.quascirev.2009.02.002.
4. Timmons, E.A.; Rodriguez, A.B.; Mattheus, C.R.; DeWitt, R. Transition of a Regressive to a Transgressive Barrier Island Due to Back-Barrier Erosion, Increased Storminess, and Low Sediment Supply: Bogue Banks, North Carolina, USA. *Marine Geology* **2010**, *278*, 100–114, doi:10.1016/j.margeo.2010.09.006.

5. Lazar, K.B.; Mallinson, D.J.; Culver, S.J. Late Quaternary Development of the Croatan Beach Ridge Complex, Bogue Sound, Bogue Banks, NC, USA and Implications for Coastal Evolution. *Estuarine, Coastal and Shelf Science* **2016**, *174*, 49–64, doi:10.1016/j.ecss.2016.03.016.
6. Rodriguez, A.B.; Yu, W.; Theuerkauf, E.J. Abrupt Increase in Washover Deposition along a Transgressive Barrier Island during the Late Nineteenth Century Acceleration in Sea-Level Rise. In *Barrier Dynamics and Response to Changing Climate*; Moore, L.J., Murray, A.B., Eds.; Springer International Publishing, 2018; pp. 121–145 ISBN 978-3-319-68084-2.
7. Gayes, P.T.; Scott, D.B.; Collins, E.S.; Nelson, D.D. A Late Holocene Sea-Level Fluctuation in South Carolina. In *Quaternary coasts of the United States - marine and lacustrine systems*; Special Publication; SEPM (Society for Sedimentary Geology): Tulsa, Oklahoma, 1992; Vol. 48, pp. 155–160.
8. Gardner, L.R.; Porter, D.E. Stratigraphy and Geologic History of a Southeastern Salt Marsh Basin, North Inlet, South Carolina, USA. *Wetlands Ecology and Management* **2001**, *9*, 371–385.
9. Long, J.H.; Hanebuth, T.J.J.; Lüdmann, T. The Quaternary Stratigraphic Architecture of a Low-Accommodation, Passive-Margin Continental Shelf (Santee Delta Region, South Carolina, U.S.A.). *Journal of Sedimentary Research* **2020**, *90*, 1549–1571, doi:10.2110/jsr.2020.006.
10. Duc, A.W. Back-Barrier Stratigraphy of Kiawah Island, South Carolina. Ph.D., University of South Carolina: Columbia, SC, 1981.
11. Long, J.H.; Hanebuth, T.J.J.; Alexander, C.R.; Wehmiller, J.F. Depositional Environments and Stratigraphy of Quaternary Paleochannel Systems Offshore of the Georgia Bight, Southeastern U.S.A. *Journal of Coastal Research* **2021**, *37*, 883–905, doi:10.2112/JCOASTRES-D-20-00088.1.
12. Vaughn, D.R.; Bianchi, T.S.; Shields, M.R.; Kenney, W.F.; Osborne, T.Z. Blue Carbon Soil Stock Development and Estimates within Northern Florida Wetlands. *Front. Earth Sci.* **2021**, *9*, 552721, doi:10.3389/feart.2021.552721.
